# Supplementary material for: Scoping review of cytolytic vaginosis literature
Source: PubMed Central journal article supplement (PMC9879469; doi:10.1371/journal.pone.0280954), 2023-01-26
Supplement: pone.0280954.s001.pdf [file pone.0280954.s001.pdf]

## Scoping Review of Cytolytic Vaginosis Literature

**S1 Table: Vaginitis differential diagnosis**

|                          | More common                                                                                                                                             | Less common                                                                                                                                                                                                                                                                                             |
|--------------------------|---------------------------------------------------------------------------------------------------------------------------------------------------------|---------------------------------------------------------------------------------------------------------------------------------------------------------------------------------------------------------------------------------------------------------------------------------------------------------|
| Dermatologic             | Contact dermatitis (allergic and irritant), lichens simplex chronicus, psoriasis, atopic dermatitis, folliculitis, lichen sclerosus, atrophic vaginitis | Lichens planus, hidradenitis suppurativa, pityriasis rosea, prurigo nodularis, and autoimmune blistering diseases                                                                                                                                                                                       |
| Infectious               | Candidiasis, trichomonas, herpes simplex, gonorrhea, chlamydia                                                                                          | Tinea cruris and versicolor, impetigo, perianal streptococcal infection, and scabies                                                                                                                                                                                                                    |
| Vaginal dysbiosis        | Bacterial vaginosis                                                                                                                                     | Cytolytic vaginosis, aerobic vaginitis/desquamative inflammatory vaginitis, leptothrix                                                                                                                                                                                                                  |
| Malignancy/premalignancy |                                                                                                                                                         | Cervical cancer (squamous cell carcinoma and adenocarcinoma), HSIL (high grade squamous, intraepithelial lesion), Vulvar cancer (squamous cell carcinoma, verrucous carcinoma, basal cell carcinoma, and sarcoma), dVIN (differentiated vulvar intraepithelial neoplasia), Extramammary Paget's disease |
| Other                    |                                                                                                                                                         | Crohn's disease, insect bites, and trauma                                                                                                                                                                                                                                                               |
