# Supplementary material for: Scoping review of cytolytic vaginosis literature
Source: PubMed Central journal article supplement (PMC9879469; doi:10.1371/journal.pone.0280954), 2023-01-26
Supplement: pone.0280954.s005.pdf [file pone.0280954.s005.pdf]

## Scoping Review of Cytolytic Vaginosis Literature

S5 Table: Likelihood ratio of symptoms/signs in Yang 2017 study

|                            | Sensitivity | Specificity | Positive predictive value | Negative predictive value | Positive likelihood ratio | Negative likelihood ratio |
|----------------------------|-------------|-------------|---------------------------|---------------------------|---------------------------|---------------------------|
| Discharge - paste like     | 60%         | 71%         | 61%                       | 71%                       | <b>2.10</b>               | <b>0.56</b>               |
| Discharge - large quantity | 44%         | 72%         | 54%                       | 64%                       | <b>1.60</b>               | <b>0.77</b>               |
| Symptoms - luteal phase    | 80%         | 38%         | 49%                       | 72%                       | <b>1.29</b>               | <b>0.53</b>               |
| Signs - no swelling        | 52%         | 67%         | 54%                       | 66%                       | <b>1.58</b>               | <b>0.71</b>               |
| Signs - no erosions        | 68%         | 57%         | 54%                       | 71%                       | <b>1.58</b>               | <b>0.56</b>               |
| Signs - no ulcerations     | 85%         | 42%         | 52%                       | 79%                       | <b>1.47</b>               | <b>0.36</b>               |
