# Supplementary material for: Scoping review of cytolytic vaginosis literature
Source: PubMed Central journal article supplement (PMC9879469; doi:10.1371/journal.pone.0280954), 2023-01-26
Supplement: pone.0280954.s007.pdf [file pone.0280954.s007.pdf]

**Scoping Review of Cytolytic Vaginosis Literature**  
**S1 File – Search Strategy**

**Ovid MEDLINE(R) and Epub Ahead of Print, In-Process & Other Non-Indexed Citations and Daily <1946 to April 03, 2019>**

|  |
|--|
|  |
|--|

| # | Search Statement                                                                                                                                                                                                                                                                                                                                              | Results |
|---|---------------------------------------------------------------------------------------------------------------------------------------------------------------------------------------------------------------------------------------------------------------------------------------------------------------------------------------------------------------|---------|
| 1 | (cytolytic vaginosis or "lactobacillus overgrowth").mp.                                                                                                                                                                                                                                                                                                       | 25      |
| 2 | <a href="#">lactobacillus.mp.</a> or exp Lactobacillus/ or Doderlein*.mp. [mp=title, abstract, original title, name of substance word, subject heading word, floating sub-heading word, keyword heading word, organism supplementary concept word, protocol supplementary concept word, rare disease supplementary concept word, unique identifier, synonyms] | 36064   |
| 3 | (cytoly* or lysis).mp. [mp=title, abstract, original title, name of substance word, subject heading word, floating sub-heading word, keyword heading word, organism supplementary concept word, protocol supplementary concept word, rare disease supplementary concept word, unique identifier, synonyms]                                                    | 60555   |
| 4 | 2 and 3                                                                                                                                                                                                                                                                                                                                                       | 245     |
| 5 | exp Vagina/ or exp Vaginal Diseases/ or vagin*.mp.                                                                                                                                                                                                                                                                                                            | 145852  |
| 6 | 4 and 5                                                                                                                                                                                                                                                                                                                                                       | 29      |
| 7 | 1 or 6                                                                                                                                                                                                                                                                                                                                                        | 42      |
| 8 | remove duplicates from 7                                                                                                                                                                                                                                                                                                                                      | 42      |

**Embase <1974 to 2019 April 03>**

| # | Search Statement                                                                                                                                                                                                                                                 | Results |
|---|------------------------------------------------------------------------------------------------------------------------------------------------------------------------------------------------------------------------------------------------------------------|---------|
| 1 | (cytolytic vaginosis or "lactobacillus overgrowth").mp.                                                                                                                                                                                                          | 32      |
| 2 | <a href="#">lactobacillus.mp.</a> or exp Lactobacillus/ or Doderlein*.mp. [mp=title, abstract, heading word, drug trade name, original title, device manufacturer, drug manufacturer, device trade name, keyword, floating subheading word, candidate term word] | 43670   |
| 3 | (cytoly* or lysis).mp. [mp=title, abstract, heading word, drug trade name, original title, device manufacturer, drug manufacturer, device trade name, keyword, floating subheading word, candidate term word]                                                    | 119883  |
| 4 | 2 and 3                                                                                                                                                                                                                                                          | 323     |

|   |                                                  |            |
|---|--------------------------------------------------|------------|
| 5 | exp vagina/ or exp vagina disease/ or vagin*.mp. | 20372<br>7 |
| 6 | 4 and 5                                          | 44         |
| 7 | 1 or 6                                           | 60         |
| 8 | remove duplicates from 7                         | 58         |

## PROSPERO Searched April 43, 2019 Results =0

**PROSPERO**  
International prospective register of systematic reviews

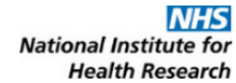

Home | About PROSPERO | How to register Search | Log in | Join

Click to [hide your search history and show search results](#). Open the **Filters** panel to find records with specific characteristics (e.g. all reviews about cancer or all diagnostic reviews etc)

Q #1 AND #2 AND #3

Select all | Unselect all | Clear history | **Combine checked lines with** AND | OR | NOT

|                          | Line | Search for                                          | Hits |
|--------------------------|------|-----------------------------------------------------|------|
| <input type="checkbox"/> | #1   | lactobacillus OR doderlein*                         | 91   |
| <input type="checkbox"/> | #2   | cytoly* or lysis                                    | 22   |
| <input type="checkbox"/> | #3   | vagin*                                              | 772  |
| <input type="checkbox"/> | #4   | "cytolytic vaginosis" or "lactobacillus overgrowth" | 0    |
| <input type="checkbox"/> | #5   | "cytolytic vaginosis"                               | 0    |
| <input type="checkbox"/> | #6   | "lactobacillus overgrowth"                          | 0    |
| <input type="checkbox"/> | #7   | #1 AND #2 AND #3                                    | 0    |

## CINAHL Searched April 4, 2019 Results =9

## Search History/Alerts

[Print Search History](#)
[Retrieve Searches](#)
[Retrieve Alerts](#)
[Save Searches / Alerts](#)

| Search ID#                  | Search Terms                                                                                                                             | Search Options                          | Actions                                                                                                                  |
|-----------------------------|------------------------------------------------------------------------------------------------------------------------------------------|-----------------------------------------|--------------------------------------------------------------------------------------------------------------------------|
| <input type="checkbox"/> S1 |  (MH "Lactobacillus+") OR "lactobacillus" or Doderlein* | Search modes - Find all my search terms |  <a href="#">View Results</a> (2,999) |
| <input type="checkbox"/> S2 |  cytoly* or lysis                                       | Search modes - Find all my search terms |  <a href="#">View Results</a> (2,073) |
| <input type="checkbox"/> S3 |  (MH "Vagina") OR "vagina" OR (MH "Vaginal Diseases+")  | Search modes - Find all my search terms |  <a href="#">View Results</a> (8,891) |
| <input type="checkbox"/> S4 |  S1 AND S2 AND S3                                       | Search modes - Find all my search terms |  <a href="#">View Results</a> (3)     |
| <input type="checkbox"/> S5 |  "cytolytic vaginosis" or "lactobacillus overgrowth"    | Search modes - Find all my search terms |  <a href="#">View Results</a> (9)     |
| <input type="checkbox"/> S6 |  S4 OR S5                                               | Search modes - Find all my search terms |  <a href="#">View Results</a> (9)     |

## SCOPUS Searched April 4, 2019 Results = 61

( TITLE-ABS-KEY ( ( lactobacillus OR doderlein\* ) AND ( cytoly\* OR lysis ) AND vagin\* ) OR TITLE-ABS-KEY ( cytolytic AND vaginosis OR "lactobacillus overgrowth" ) )

## Cochrane Library Searched April 4, 2019 Results =61

|                       |                         |             |                 |                          |                       |               |
|-----------------------|-------------------------|-------------|-----------------|--------------------------|-----------------------|---------------|
| Cochrane Reviews<br>0 | Cochrane Protocols<br>0 | Trials<br>0 | Editorials<br>0 | Special collections<br>0 | Clinical Answers<br>0 | Other Reviews |
|-----------------------|-------------------------|-------------|-----------------|--------------------------|-----------------------|---------------|

**0** Cochrane Reviews matching on ( **lactobacillus OR doderlein\*** ) AND ( **cytoly\* OR lysis** ) AND **vagin\*** in Title Abstract Keyword OR "**cytolytic vaginosis**" OR "**lactobacillus overgrowth**" in Title Abstract Keyword - (Word variations have been searched)

**Cochrane Database of Systematic Reviews**  
 Issue 4 of 12, April 2019

## ProQuest Dissertations & Theses Global Searched April 4, 2019 Results =2

noft((( lactobacillus OR doderlein\* ) AND ( cytoly\* OR lysis ) AND vagin\* ) ) OR noft("cytolytic vaginosis" OR "lactobacillus overgrowth" )
